# Supplementary material
Source: PubMed Central journal article supplement (PMC3664941)
Supplement: NIHMS370728-supplement-2.pdf [file NIHMS370728-supplement-2.pdf]

**FIGURE S1:** *Induced  $Mist1^{myc}$  expression has no effect on  $Mist1^{Het}$  acinar cells. (A)* H&E and anti-myc images of *WT* and  *$Mist1^{CreER/+}$  ( $Mist1^{Het}$ )/ $LSL-Mist1^{myc}$*  pancreata 3 months post-TM. arrows -  $MIST1^{myc}$  positive acinar cells. **(B)** Analysis of acinar and ductal gene expression profiles by RT-qPCR reveals no significant differences in *WT* and  *$Mist1^{HET}$ / $LSL-Mist1^{myc}$*  pancreata expression. **(C)**  $MIST1$  gene targets are not significantly affected by constitutive  $MIST1^{myc}$  expression in  *$Mist1^{Het}$*  pancreata.

**FIGURE S2:** *Characterization of  $MIST1$  target genes.* Grouping of 20  $MIST1$  target genes and their putative functions in acinar cells.

**FIGURE S3:** *TA- and GC- E-boxes are found associated with the ChIP amplified regions of  $MIST1$  target genes.* Position and sequence of the E-box regulatory elements associated with each ChIP amplicon for the  $MIST1$  target genes.

**FIGURE S4:** *Zymogen granule localization and diameter are rescued by  $LSL-Mist1^{myc}$  expression. (A)* Relative positions of individual zymogen granules in the indicated acinar cells. **(B)** Average zymogen granule size in *WT*,  *$Mist1^{KO}$*  and 1- and 4-day post-TM  *$Mist1^{KO}$ / $LSL-Mist1^{myc}$*  acini.

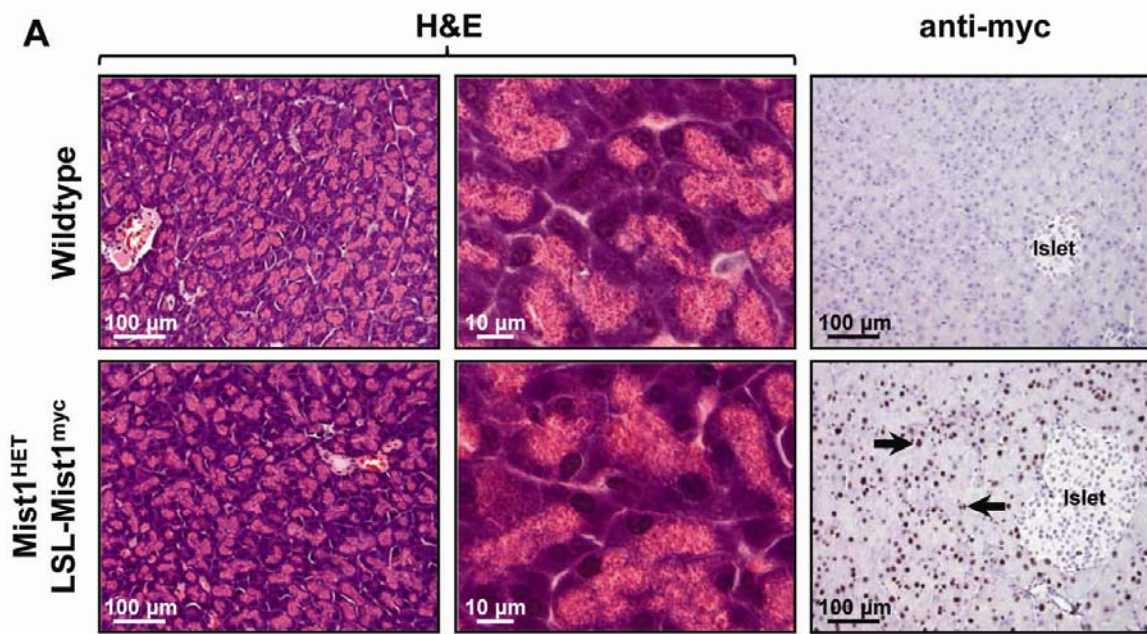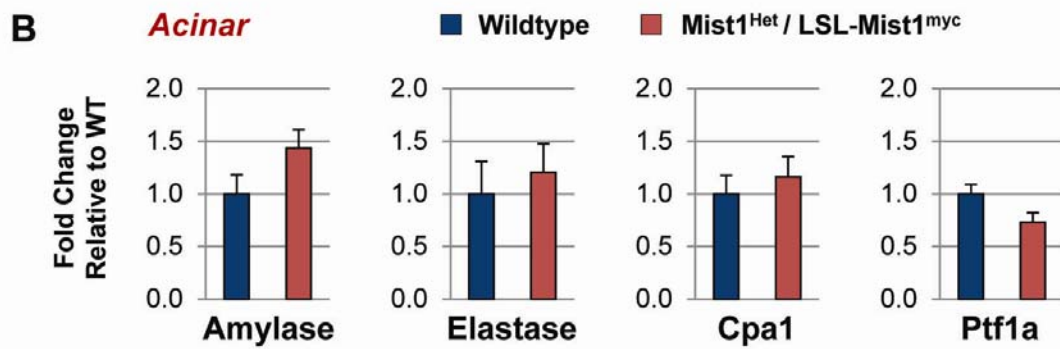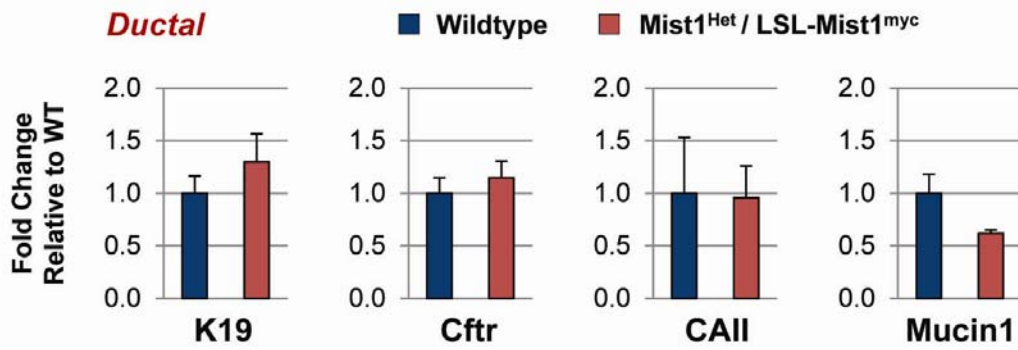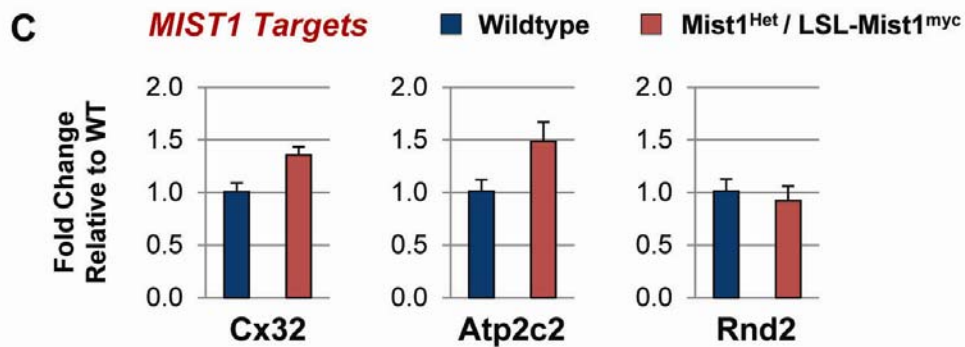

FIGURE S1

| Secretion   | Putative Function                                                                         | Ref. |
|-------------|-------------------------------------------------------------------------------------------|------|
| Rab3d       | Rab GTPase responsible for the formation of large secretory granules                      | 1    |
| Rab27a      | Rab GTPase known to regulate vesicle trafficking and granule exocytosis                   | 2, 3 |
| Gjb1 (Cx32) | Gap-junction protein essential for intra-cellular signaling through Ca <sup>2+</sup> ions | 4    |
| Atp2c2      | Secretory pathway Ca <sup>2+</sup> -ATPase localized to the ER in acinar cells            | 5    |
| Copz2       | Subunit of the coatamer protein complex involved in COPI-mediated vesicle transport       | 6, 7 |

| Stress Prevention/<br>Response | Putative Function                                                                                    | Ref.   |
|--------------------------------|------------------------------------------------------------------------------------------------------|--------|
| Htra2                          | Serine protease / chaperone protein involved in mitochondrial homeostasis and cell stress prevention | 8-10   |
| Uba5                           | E1-like ubiquitin activating enzyme that activates Ufm1 ubiquitin-like modifier protein              | 11, 12 |
| Abcb6                          | ATP-binding cassette (ABC) transporter involved in porphyrin transport and protects against stress   | 13-15  |
| Nox4                           | Subunit of the NADPH oxidase complex upregulated by Nfe2l2 during cell stress events                 | 16, 17 |
| Gstm4                          | Glutathione S-transferase involved in detoxification of electrophilic compounds                      | 18, 19 |
| Nfe2l2                         | bZIP transcription factor that activates an antioxidant and cellular detoxification program          | 20, 21 |
| Aldh1a1                        | Alcohol dehydrogenase enzyme important for detoxification of oxidative damage                        | 22, 23 |

| Signaling | Putative Function                                                                                     | Ref.   |
|-----------|-------------------------------------------------------------------------------------------------------|--------|
| Rnd2      | Rho GTPase implicated in the regulation of actin dynamics                                             | 24-26  |
| Cldn10    | Tight-junction protein expressed in pancreatic acini                                                  | 27, 28 |
| Ppap2b    | Phosphatidic acid phosphatase enzyme important for lipid metabolism and β-catenin signaling           | 29-32  |
| Ptgr1     | Catalyzes the metabolism of leukotriene B4 which plays an important role in pancreatitis inflammation | 33-35  |

| Miscellaneous | Putative Function                                                                                    | Ref.   |
|---------------|------------------------------------------------------------------------------------------------------|--------|
| Wdyhv1        | N-terminal amidohydrolase comprising a part of the N-end rule pathway of protein degradation         | 36     |
| Foxp2         | Transcription factor known to participate in development of speech and language regions of the brain | 37     |
| Slc35d1       | Nucleotide sugar transporter that transports both UDP-glucuronic acid and UDP-N-acetylgalactosamine  | 38     |
| Smarca1       | SWI/SNF family chromatin remodeling factor shown to positively regulate transcription                | 39, 40 |

References

1. Tian X, Jin RU, Bredemeyer AJ, Oates EJ, Blazewska KM, McKenna CE, Mills JC. RAB26 and RAB3D are direct transcriptional targets of MIST1 that regulate exocrine granule maturation. *Mol Cell Biol* 2010;30:1269-84.
2. Kasai K, Ohara-Imaizumi M, Takahashi N, Mizutani S, Zhao S, Kikuta T, Kasai H, Nagamatsu S, Gomi H, Izumi T. Rab27a mediates the tight docking of insulin granules onto the plasma membrane during glucose stimulation. *J Clin Invest* 2005;115:388-96.
3. Yi Z, Yokota H, Torii S, Aoki T, Hosaka M, Zhao S, Takata K, Takeuchi T, Izumi T. The Rab27a/granuphilin complex regulates the exocytosis of insulin-containing dense-core granules. *Mol Cell Biol* 2002;22:1858-67.
4. Rukstalis JM, Kowalik A, Zhu L, Lidington D, Pin CL, Konieczny SF. Exocrine specific expression of Connexin32 is dependent on the basic helix-loop-helix transcription factor Mist1. *J Cell Sci* 2003;116:3315-25.
5. Garside VC, Kowalik AS, Johnson CL, DiRenzo D, Konieczny SF, Pin CL. MIST1 regulates the pancreatic acinar cell expression of Atp2c2, the gene encoding secretory pathway calcium ATPase 2. *Exp Cell Res* 2010;316:2859-70.
6. Futatsumori M, Kasai K, Takatsu H, Shin HW, Nakayama K. Identification and characterization of novel isoforms of COP I subunits. *J Biochem* 2000;128:793-801.

7. Moelleken J, Malsam J, Betts MJ, Movafeghi A, Reckmann I, Meissner I, Hellwig A, Russell RB, Sollner T, Brugger B, Wieland FT. Differential localization of coatamer complex isoforms within the Golgi apparatus. *Proc Natl Acad Sci U S A* 2007;104:4425-30.
8. Behbahani H, Pavlov PF, Wiehager B, Nishimura T, Winblad B, Ankarcrona M. Association of Omi/HtrA2 with gamma-secretase in mitochondria. *Neurochem Int* 2010;57:668-75.
9. Li B, Hu Q, Wang H, Man N, Ren H, Wen L, Nukina N, Fei E, Wang G. Omi/HtrA2 is a positive regulator of autophagy that facilitates the degradation of mutant proteins involved in neurodegenerative diseases. *Cell Death Differ* 2010;17:1773-84.
10. Moiso N, Klupsch K, Fedele V, East P, Sharma S, Renton A, Plun-Favreau H, Edwards RE, Teismann P, Esposti MD, Morrison AD, Wood NW, Downward J, Martins LM. Mitochondrial dysfunction triggered by loss of HtrA2 results in the activation of a brain-specific transcriptional stress response. *Cell Death Differ* 2009;16:449-64.
11. Lemaire K, Moura RF, Granvik M, Igoillo-Esteve M, Hohmeier HE, Hendrickx N, Newgard CB, Waelkens E, Cnop M, Schuit F. Ubiquitin fold modifier 1 (UFM1) and its target UFBP1 protect pancreatic beta cells from ER stress-induced apoptosis. *PLoS One* 2011;6:e18517.
12. Zheng M, Gu X, Zheng D, Yang Z, Li F, Zhao J, Xie Y, Ji C, Mao Y. UBE1DC1, an ubiquitin-activating enzyme, activates two different ubiquitin-like proteins. *J Cell Biochem* 2008;104:2324-34.
13. Krishnamurthy PC, Du G, Fukuda Y, Sun D, Sampath J, Mercer KE, Wang J, Sosa-Pineda B, Murti KG, Schuetz JD. Identification of a mammalian mitochondrial porphyrin transporter. *Nature* 2006;443:586-9.
14. Lynch J, Fukuda Y, Krishnamurthy P, Du G, Schuetz JD. Cell survival under stress is enhanced by a mitochondrial ATP-binding cassette transporter that regulates hemoproteins. *Cancer Res* 2009;69:5560-7.
15. Mitsuhashi N, Miki T, Senbongi H, Yokoi N, Yano H, Miyazaki M, Nakajima N, Iwanaga T, Yokoyama Y, Shibata T, Seino S. MTABC3, a novel mitochondrial ATP-binding cassette protein involved in iron homeostasis. *J Biol Chem* 2000;275:17536-40.
16. Pedruzzi E, Guichard C, Ollivier V, Driss F, Fay M, Prunet C, Marie JC, Pouzet C, Samadi M, Elbim C, O'Dowd Y, Bens M, Vandewalle A, Gougerot-Pocidallo MA, Lizard G, Ogier-Denis E. NAD(P)H oxidase Nox-4 mediates 7-ketocholesterol-induced endoplasmic reticulum stress and apoptosis in human aortic smooth muscle cells. *Mol Cell Biol* 2004;24:10703-17.
17. Shiose A, Kuroda J, Tsuruya K, Hirai M, Hirakata H, Naito S, Hattori M, Sakaki Y, Sumimoto H. A novel superoxide-producing NAD(P)H oxidase in kidney. *J Biol Chem* 2001;276:1417-23.
18. Guo J, Zimniak L, Zimniak P, Orchard JL, Singh SV. Cloning and expression of a novel Mu class murine glutathione transferase isoenzyme. *Biochem J* 2002;366:817-24.
19. Comstock KE, Johnson KJ, Riftenberg D, Henner WD. Isolation and analysis of the gene and cDNA for a human Mu class glutathione S-transferase, GSTM4. *J Biol Chem* 1993;268:16958-65.
20. Chanas SA, Jiang Q, McMahon M, McWalter GK, McLellan LI, Elcombe CR, Henderson CJ, Wolf CR, Moffat GJ, Itoh K, Yamamoto M, Hayes JD. Loss of the Nrf2 transcription factor causes a marked reduction in constitutive and inducible expression of the glutathione S-transferase Gsta1, Gsta2, Gstm1, Gstm2, Gstm3 and Gstm4 genes in the livers of male and female mice. *Biochem J* 2002;365:405-16.
21. Moi P, Chan K, Asunis I, Cao A, Kan YW. Isolation of NF-E2-related factor 2 (Nrf2), a NF-E2-like basic leucine zipper transcriptional activator that binds to the tandem NF-E2/AP1 repeat of the beta-globin locus control region. *Proc Natl Acad Sci U S A* 1994;91:9926-30.
22. Maeda M, Hasumura Y, Takeuchi J. Localization of cytoplasmic and mitochondrial aldehyde dehydrogenase isozymes in human liver. *Lab Invest* 1988;59:75-81.
23. Makia NL, Bojang P, Falkner KC, Conklin DJ, Prough RA. Murine hepatic aldehyde dehydrogenase 1a1 is a major contributor to oxidation of aldehydes formed by lipid peroxidation. *Chem Biol Interact* 2011;191:278-87.
24. Fujita H, Katoh H, Ishikawa Y, Mori K, Negishi M. Rapostlin is a novel effector of Rnd2 GTPase inducing neurite branching. *J Biol Chem* 2002;277:45428-34.
25. Nobes CD, Lauritzen I, Mattei MG, Paris S, Hall A, Chardin P. A new member of the Rho family, Rnd1, promotes disassembly of actin filament structures and loss of cell adhesion. *J Cell Biol* 1998;141:187-97.
26. Tanaka H, Katoh H, Negishi M. Pragmin, a novel effector of Rnd2 GTPase, stimulates RhoA activity. *J Biol Chem* 2006;281:10355-64.
27. Inai T, Sengoku A, Guan X, Hirose E, Iida H, Shibata Y. Heterogeneity in expression and subcellular localization of tight junction proteins, claudin-10 and -15, examined by RT-PCR and immunofluorescence microscopy. *Arch Histol Cytol* 2005;68:349-60.

28. Seo HW, Rengaraj D, Choi JW, Ahn SE, Song YS, Song G, Han JY. Claudin 10 is a glandular epithelial marker in the chicken model as human epithelial ovarian cancer. *Int J Gynecol Cancer* 2010;20:1465-73.
29. Chatterjee I, Humtsoe JO, Kohler EE, Sorio C, Wary KK. Lipid phosphate phosphatase-3 regulates tumor growth via beta-catenin and CYCLIN-D1 signaling. *Mol Cancer* 2011;10:51.
30. Humtsoe JO, Liu M, Malik AB, Wary KK. Lipid phosphate phosphatase 3 stabilization of beta-catenin induces endothelial cell migration and formation of branching point structures. *Mol Cell Biol* 2010;30:1593-606.
31. Kai M, Wada I, Imai S, Sakane F, Kanoh H. Cloning and characterization of two human isozymes of Mg<sup>2+</sup>-independent phosphatidic acid phosphatase. *J Biol Chem* 1997;272:24572-8.
32. Roberts R, Sciorra VA, Morris AJ. Human type 2 phosphatidic acid phosphohydrolases. Substrate specificity of the type 2a, 2b, and 2c enzymes and cell surface activity of the 2a isoform. *J Biol Chem* 1998;273:22059-67.
33. Chen X, Edwards JA, Logsdon CD, Ernst SA, Williams JA. Dominant negative Rab3D inhibits amylase release from mouse pancreatic acini. *J Biol Chem* 2002;277:18002-9.
34. Folch E, Closa D, Prats N, Gelpi E, Rosello-Catafau J. Leukotriene generation and neutrophil infiltration after experimental acute pancreatitis. *Inflammation* 1998;22:83-93.
35. Yokomizo T, Ogawa Y, Uozumi N, Kume K, Izumi T, Shimizu T. cDNA cloning, expression, and mutagenesis study of leukotriene B<sub>4</sub> 12-hydroxydehydrogenase. *J Biol Chem* 1996;271:2844-50.
36. Wang H, Piatkov KI, Brower CS, Varshavsky A. Glutamine-specific N-terminal amidase, a component of the N-end rule pathway. *Mol Cell* 2009;34:686-95.
37. Shu W, Yang H, Zhang L, Lu MM, Morrisey EE. Characterization of a new subfamily of winged-helix/forkhead (Fox) genes that are expressed in the lung and act as transcriptional repressors. *J Biol Chem* 2001;276:27488-97.
38. Muraoka M, Kawakita M, Ishida N. Molecular characterization of human UDP-glucuronic acid/UDP-N-acetylgalactosamine transporter, a novel nucleotide sugar transporter with dual substrate specificity. *FEBS Lett* 2001;495:87-93.
39. Barak O, Lazzaro MA, Lane WS, Speicher DW, Picketts DJ, Shiekhattar R. Isolation of human NURF: a regulator of Engrailed gene expression. *EMBO J* 2003;22:6089-100.
40. Smith CL, Peterson CL. A conserved Swi2/Snf2 ATPase motif couples ATP hydrolysis to chromatin remodeling. *Mol Cell Biol* 2005;25:5880-92.











ChIP Amplicon, TA E-box, GC E-box

***Ppap2b***

gccttctatgtgtggcctgtgctggccgggtgcctcatggacattttaccatgtctccattttaccagtgccatcatgggtcttctgtcactggctataagtcattctcatagggca  
 gggatcatggcttataatttctgtggccataatttcttgaaggcatttcttcttctcccttatctctgctacctgtgccattctgtggactggtgaggcatggaccaagcct  
 cagatgcctggagaagaagttggggtgtatttfaatcaggtgttggatgccctgtactccctcgatatttctaaaatgacagtgtaacccgtaaagacatcacacagagag  
 gaaatcaactggaaattcatgtgtgattagtgagcatttaggcagaaggcaagcgattatttggacatcagacttttgcattttagggcctgtattcgggtacaaaattacatc  
 cgtgaattatttgcaggtggcagctgcggattgaagggttctgcctttacaaaaagaacattgacaggcctgggaacagggagtgctcctggagtgagagttgtcttat  
 ccacagcaccctggaactgctccagcttgcctcaaggcaagtggcagtcctagtccaaggtgacagaaccctgtccctgttagta<sup>cagctg</sup>ccttagtgaggaagctgtca  
 atctagtgtactgacatctgtaaacagggctaggaggtatcagatataggaggaagagaactcattgttaaatgcctaccataccatgtctcctcctcagactggattggc  
 atcctcctttactggggcggctcggagaaaattaagcaactcgtgaagatcacatagattgtgaagtggaagctagttcaagcctgggtctaacctacctctctggggatc  
 cgtgagcttctctcacttgattccctaagaggatcttaggatgtgctgaaagtgatccctta

***Smarca1***

ttaagaggataaaacatgtctgttaaatatgaccattagtttttcttaacaccatcagtaccaagaacatacggcttataaaatcaccactaccataatttaaatagaacaaa  
 agaaaaaaaaatgagaaagattgttggctcagtcagactggatcatagcagcaacaaagatacttggaccggaaccctgttctagccttgaaagataataatgtggttga  
 agccatcatgtggtcccacgagaaattcagatataggctaagagaaggaacaccaagtccttgaagtggcctcatgaatttgtgaaataatgagtcattctggtagttac  
 tgaattgttaacttctatgatgttcattcgttaaaaataggcattctagattggaggcaagattaatttgagattcctacattcacatggctctgttcttata<sup>atcactgcctgttct</sup>  
<sup>ccaaccccaatggaattgtgaagctaaagaccattcaaacacaaagttcatattagggtagagcagccgagctagaccaggggttgagaatcataagcaagctgact</sup>  
 gaacaaagtctacaaattatgaattctaggcagattcacaataggagggtacatag<sup>cagctg</sup>tgtcttaagccaaaggctaattttacatgaatcctgtggcaaaagctatt  
 gactaagcatcaacctttacagccaaatgtgtatacttgaatgcatttcagcactgtctcaaaaaggaagaatcacgtaatatatgtggggaaattgccaagtaacaaat  
 atgttctattcccaccaaatacaattcccacattctcttgaatgtggaacacatgttcacacagaaaaagtttctctgatgaaagtcatttaattcatgtataccataaaca  
 ggtacagtagcaatgagtgcatagtagtactttgttagcaggaacacagcaacaggtacaaatatttctgtgctt

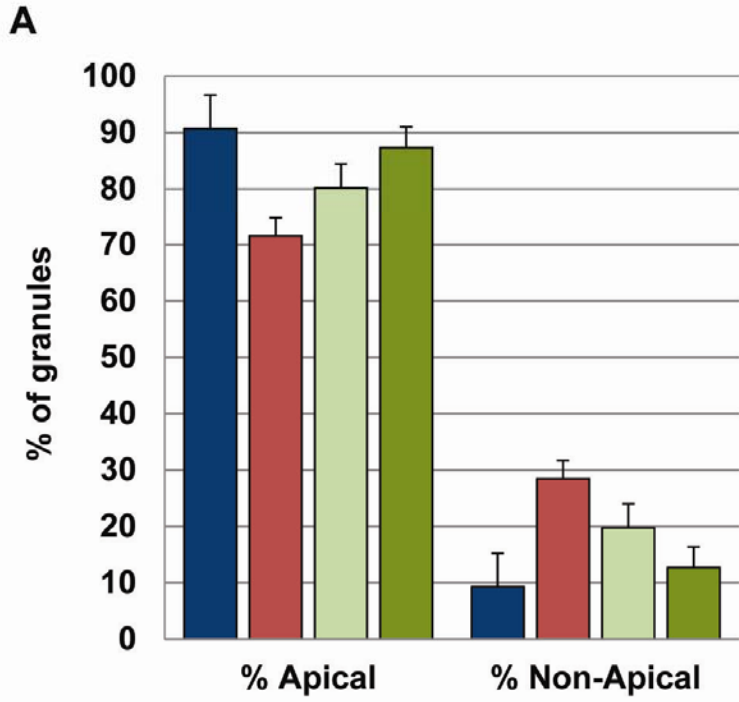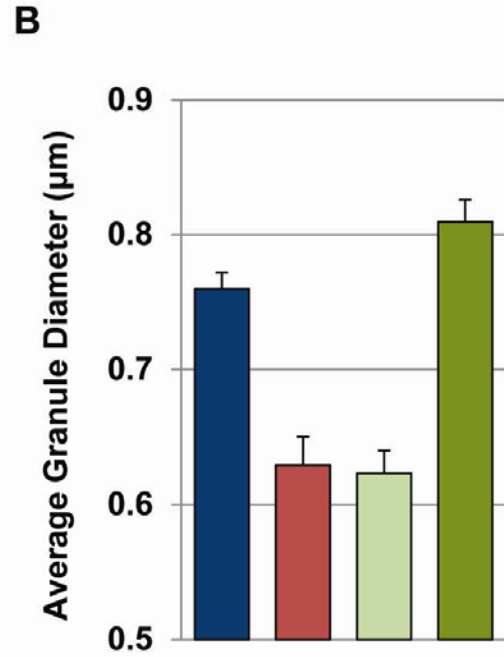

post-TM

Wildtype   
  Mist1<sup>KO</sup>   
  1 day   
  4 days Mist1<sup>KO</sup>/LSL-Mist1<sup>myc</sup>

**FIGURE S4**
